# FAER Announces Pilot Healthcare Services Research Grant, Seeks Applications for 2013 Grant Cycle, All Grant Types

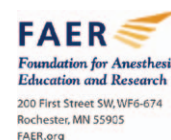

NOVEMBER 12, 2012 — With the urgency to transform healthcare along the triple aim of improving health for the individual, improving health for the population, and reducing costs, it is critical to train anesthesiologists in the science of healthcare services research. The Foundation for Anesthesia Education and Research and the Anesthesia Quality Institute are partnering to offer a pilot mentored grant for early-career investigators in the field of healthcare services research.

The **Mentored Research Training Grant – Healthcare Services Research (MRTG-HSR)** is a 2-year \$175,000 grant that provides funding for research and training in healthcare services research to faculty members who are within 10 years of having completed an anesthesiology residency or fellowship program. Year one is funded up to \$75,000. Year two is funded up to \$100,000. The MRTG-HSR requires 75 percent research time. There is dedicated funding for the MRTG-HSR to start in July 2013.

The MRTG-HSR joins the other FAER grants that are offered on an annual basis. **The application deadline for the MRTG-HSR and all FAER research grants is February 15, 2013.** Eligibility requirements and application information can be found online at [FAER.org/research-grants](http://FAER.org/research-grants).

## ADDITIONAL FAER GRANT OPPORTUNITIES— Apply by February 15

- The **Mentored Research Training Grant – Basic Science (MRTG-BS)** is a 2-year \$175,000 grant that provides funding for research and training in basic science research to faculty members who are within 10 years of having completed an anesthesiology residency or fellowship program. Year one is funded up to \$75,000. Year two is funded up to \$100,000. The MRTG-BS requires 75 percent research time.
- The **Mentored Research Training Grant – Clinical or Translational (MRTG-CT)** is a 2-year \$175,000 grant that provides funding for research and training in clinical or translational research to faculty members who are within 10 years of having completed an anesthesiology residency or fellowship program. Year one is funded up to \$75,000. Year two is funded up to \$100,000. The MRTG-CT requires 75 percent research time.
- The **Research in Education Grant (REG)** is a 2-year \$100,000 grant available to faculty members of all ranks. Year one and year two are funded up to \$50,000. The REG is focused on developing innovative techniques for anesthesia education. The REG requires 40 percent research time.
- The **Research Fellowship Grant (RFG)** is a 1-year \$75,000 grant available to anesthesiology residents after CA-1 year. The RFG is awarded in conjunction with clinical training in an anesthesiology residency or fellowship program. The REG requires 80 percent research time.

If you have questions about the Mentored Research Grant in Healthcare Services Research or about applying for a FAER research grant, contact Carol Demulling, Associate Director, 507-538-7879 or [CarolDemulling@faer.org](mailto:CarolDemulling@faer.org).

To learn more about FAER, visit [FAER.org/about](http://FAER.org/about).
